# Supplementary material
Source: PubMed Central journal article supplement (PMC3887466)
Supplement: NIHMS539415-supplement-1_si_001.pdf [file NIHMS539415-supplement-1_si_001.pdf]

## Supporting Information

### **Human serum transferrin: Is there a link between autism, high oxalate and iron deficiency anemia?**

Ashley N. Luck<sup>†,||</sup>, Cedric E. Bobst<sup>‡</sup>, Igor A. Kaltashov<sup>‡</sup> and Anne B. Mason<sup>\*†</sup>

<sup>†</sup>Department of Biochemistry, University of Vermont, College of Medicine, 89 Beaumont Avenue, Burlington, VT 05405, USA.

<sup>||</sup>Previously Ashley N. Steere; Current address: New England Biolabs, 240 County Road, Ipswich, MA 01938, USA.

<sup>‡</sup>Department of Chemistry, University of Massachusetts at Amherst, Amherst, MA 01003, USA.

## Supplementary Data

### Supporting Information Table 1.

Kinetic rate constants for the control Fe<sub>2</sub>hTF and the constructs with mutations that lock the lobes in the closed conformation preventing iron release in the absence of the sTFR.

| Construct                       | $k_1$ (min <sup>-1</sup> )            | $k_2$ (min <sup>-1</sup> )             |
|---------------------------------|---------------------------------------|----------------------------------------|
| Fe <sub>2</sub> hTF             | $17.7 \pm 2.2$ ( $k_N$ ) <sup>a</sup> | $0.65 \pm 0.06$ ( $k_C$ ) <sup>a</sup> |
| K206E/K534A Fe <sub>2</sub> hTF | $0.7 \pm 0.3$                         | $0.09 \pm 0.02$                        |
| K206E/K534E Fe <sub>2</sub> hTF | $0.9 \pm 0.4$                         | $0.15 \pm 0.03$                        |
| K206E/R632A Fe <sub>2</sub> hTF | -                                     | $0.11 \pm 0.05$                        |
| K206E/R632E Fe <sub>2</sub> hTF | $0.6 \pm 0.1$                         | $0.08 \pm 0.003$                       |

<sup>a</sup>From reference 1.

**Supporting Information Table 2.**

**Kinetic rate constants for the control Fe<sub>2</sub>hTF and the constructs with mutations that lock the lobes in the closed conformation preventing iron release in the presence of the sTFR.**

| <b>hTF/sTFR complex</b>                   | <b><math>k_1</math> (min<sup>-1</sup>)</b> | <b><math>k_2</math> (min<sup>-1</sup>)</b> |
|-------------------------------------------|--------------------------------------------|--------------------------------------------|
| <b>Fe<sub>2</sub>hTF/sTFR</b>             | $5.5 \pm 0.9$ ( $k_C$ ) <sup>a</sup>       | $1.4 \pm 0.2$ ( $k_N$ ) <sup>a</sup>       |
| <b>K206E/K534A Fe<sub>2</sub>hTF/sTFR</b> | -                                          | $2.3 \pm 0.1$                              |
| <b>K206E/K534E Fe<sub>2</sub>hTF/sTFR</b> | -                                          | $3.0 \pm 0.3$                              |
| <b>K206E/R632A Fe<sub>2</sub>hTF/sTFR</b> | -                                          | $2.0 \pm 0.1$                              |
| <b>K206E/R632E Fe<sub>2</sub>hTF/sTFR</b> | $32.3 \pm 3.4$                             | $1.2 \pm 0.05$                             |

<sup>a</sup>From reference 1.

**Supporting Information Figure 1.**

Urea gel analysis of carbonate ( $\text{CO}_3^{2-}$ ) containing  $\text{Fe}_2\text{hTF}$  and the four  $\text{Lock}_\text{N}/\text{Lock}_\text{C}$  hTF constructs (K206E/K534A  $\text{Fe}_2\text{hTF}$ , K206E/K534E  $\text{Fe}_2\text{hTF}$ , K206E/R632A  $\text{Fe}_2\text{hTF}$  and K206E/R632E  $\text{Fe}_2\text{hTF}$ ). Samples were electrophoresed before and after (+) incubation with iron removal buffer (100 mM MES, pH 5.6, containing 300 mM KCl and 4 mM EDTA) for 15 min.

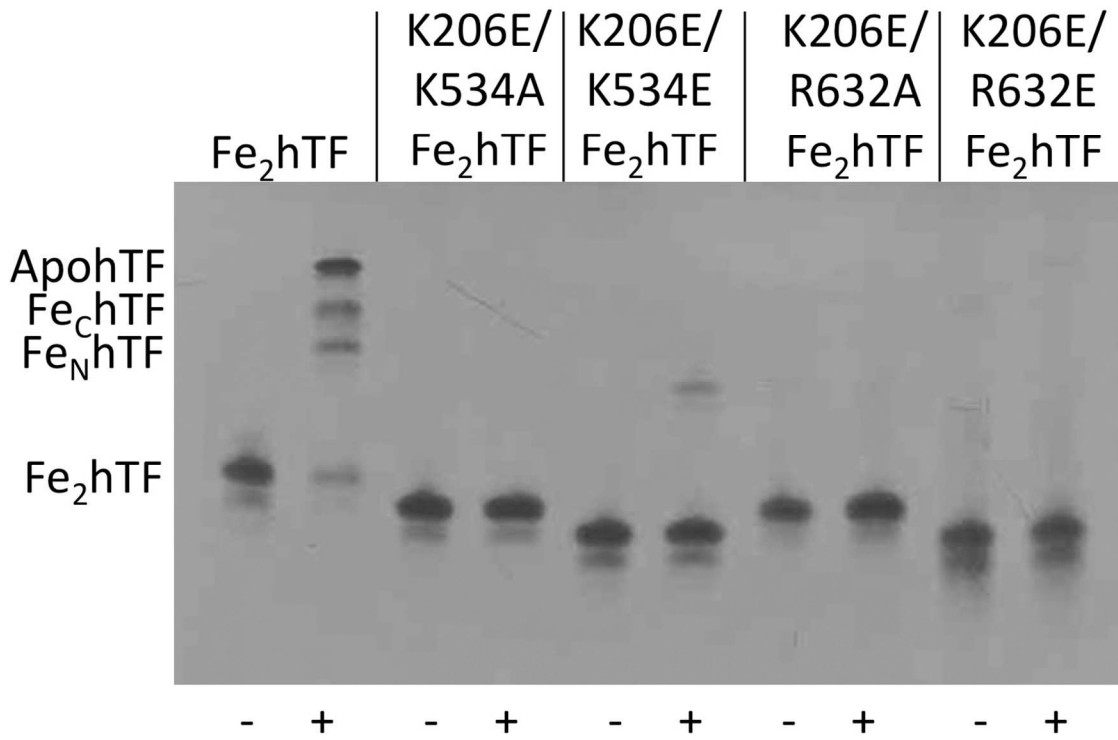

**Supporting Information Figure 2.**

Urea gel analysis of carbonate ( $\text{CO}_3^{-2}$ ) containing  $\text{Fe}_2\text{hTF/sTFR}$  and the four  $\text{Lock}_\text{N}/\text{Lock}_\text{C}$  hTF/sTFR (K206E/K534A  $\text{Fe}_2\text{hTF}$ , K206E/K534E  $\text{Fe}_2\text{hTF}$ , K206E/R632A  $\text{Fe}_2\text{hTF}$  and K206E/R632E  $\text{Fe}_2\text{hTF}$ ) complexes. Samples were electrophoresed before and after (+) incubation with iron removal buffer (100 mM MES, pH 5.6, containing 300 mM KCl and 4 mM EDTA) for 15 min.

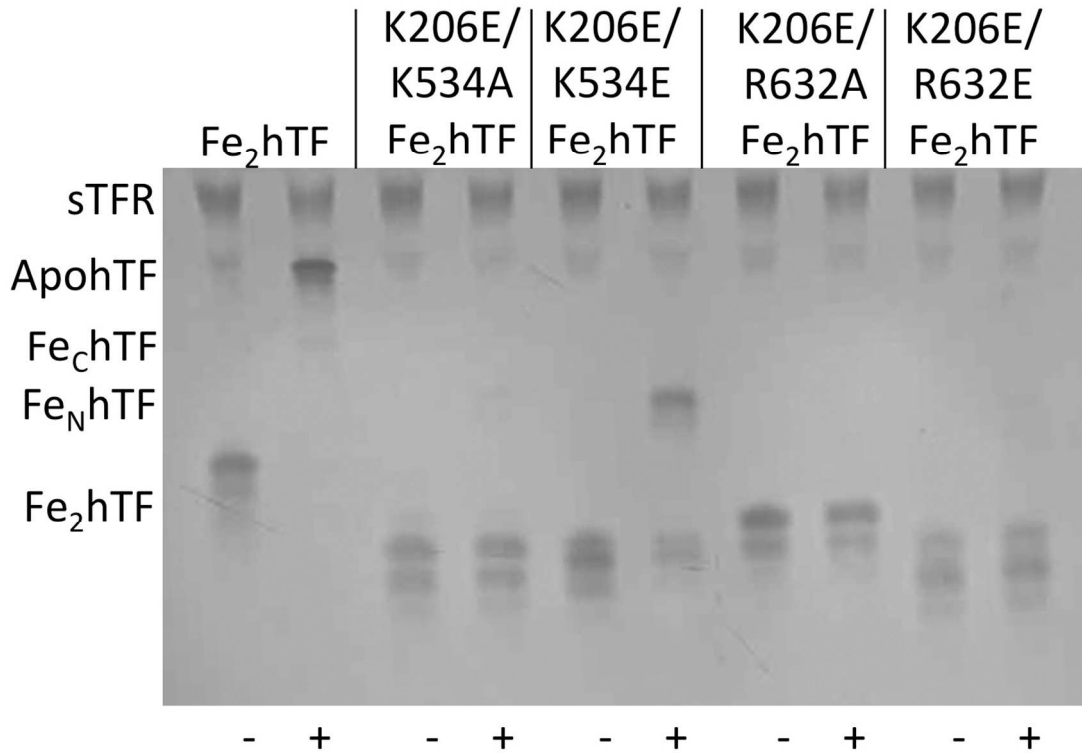

**Supporting Information Figure 3.** ESI MS analysis of the iron variants of hTF showing incomplete exchange of anion. Spectra for hTF and each monoferric variant (Fe<sub>C</sub>, and Fe<sub>N</sub>) were recorded at pH 6.7 and then at pH 3.7. The presence of carbonate was clearly evident in these samples.

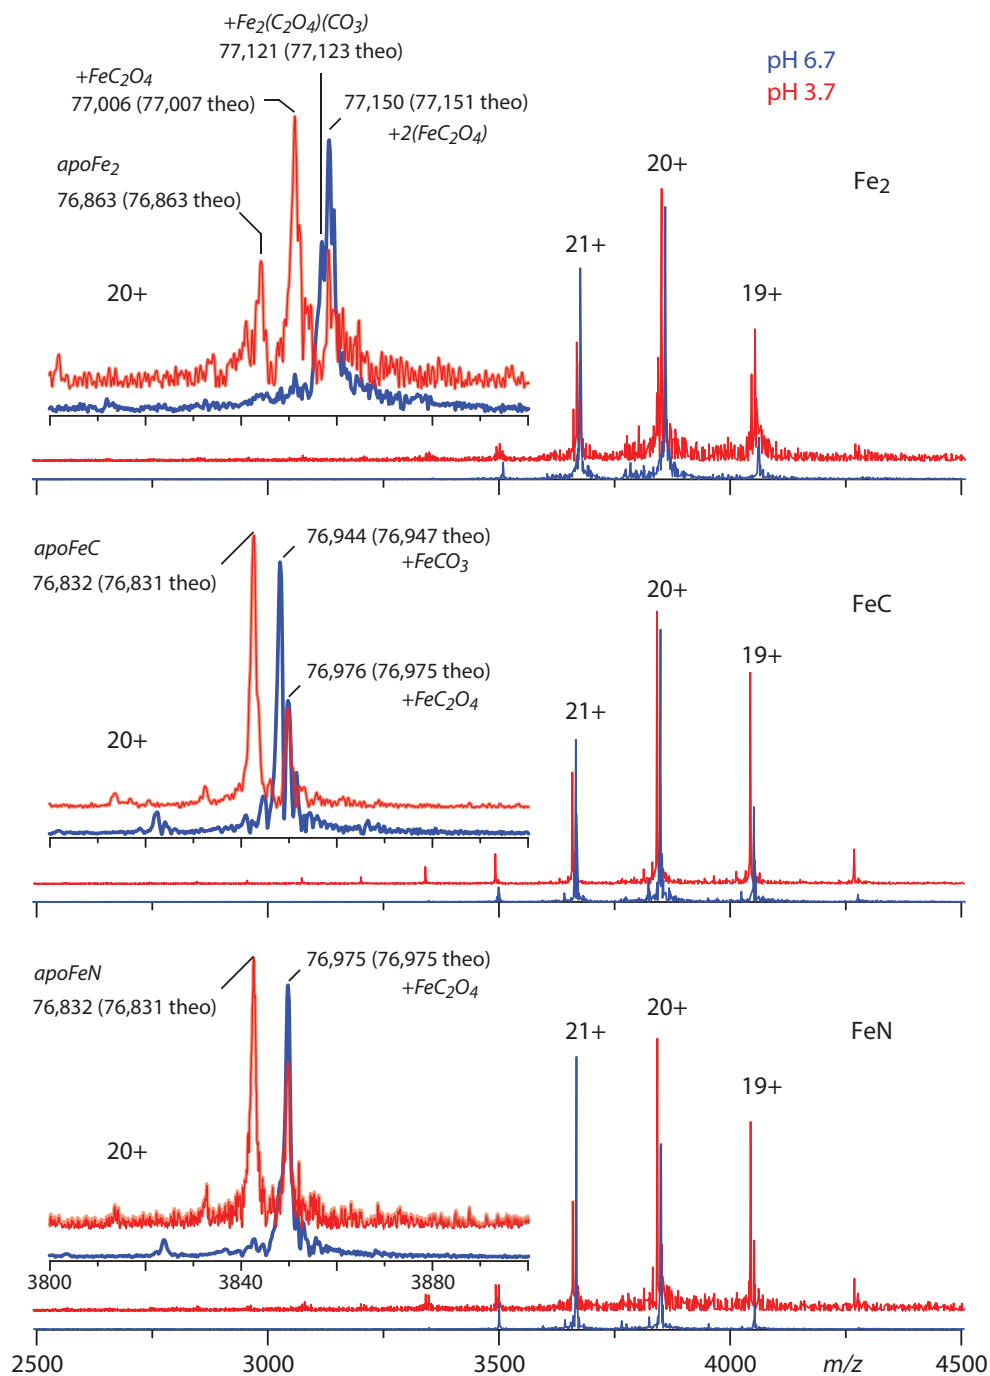

**Supporting Information Figure 4.** Iron release curves from  $\text{Fe}_2\text{hTF}_{(\text{OX})}$ ,  $\text{Fe}_\text{N}\text{hTF}_{(\text{OX})}$  and  $\text{Fe}_\text{C}\text{hTF}_{(\text{OX})}$  (black line) and fit (red line). The residuals are indicated in green.

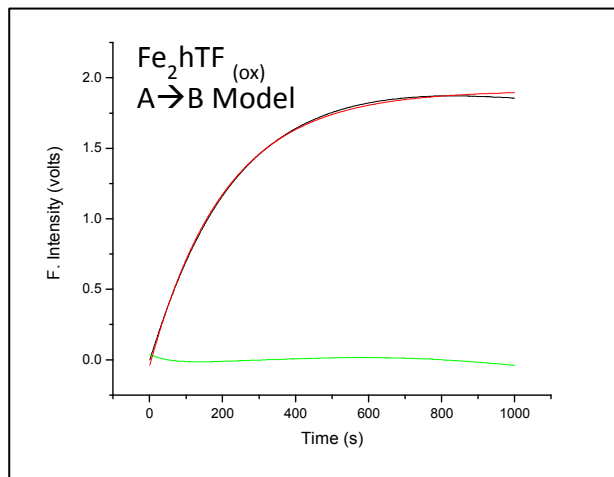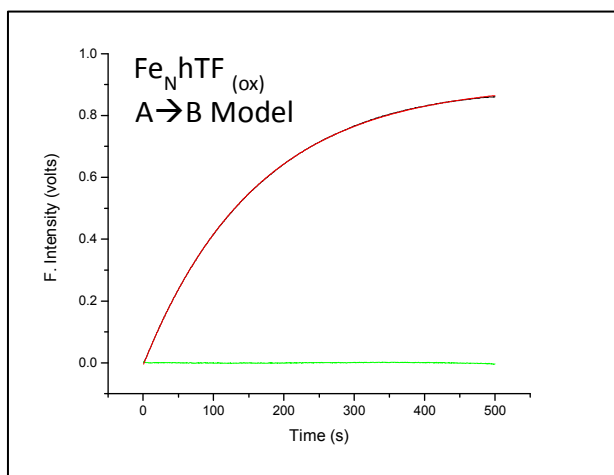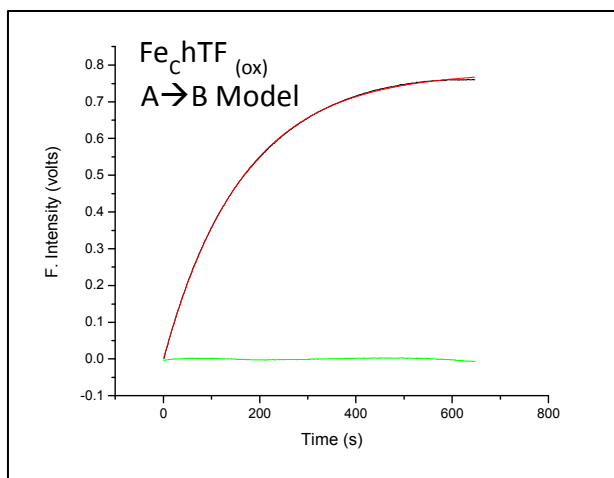

**Supporting Information Figure 5.** Iron release curves from  $\text{Fe}_2\text{hTF}_{(\text{OX})}/\text{sTFR}$ ,  $\text{Fe}_\text{N}\text{hTF}_{(\text{OX})}/\text{sTFR}$  and  $\text{Fe}_\text{C}\text{hTF}_{(\text{OX})}/\text{sTFR}$  complexes (black line) and fit (red line). The residuals are indicated in green.

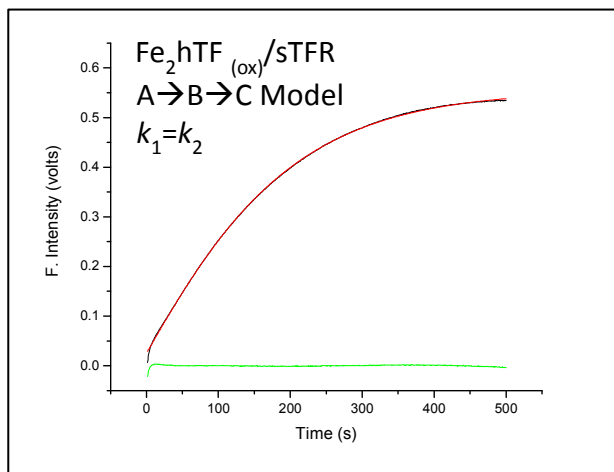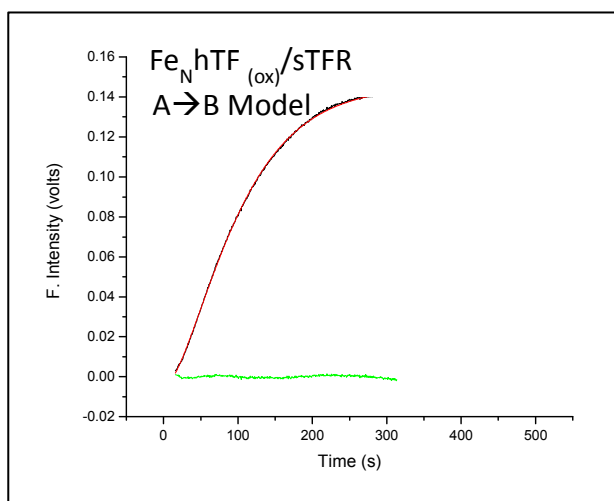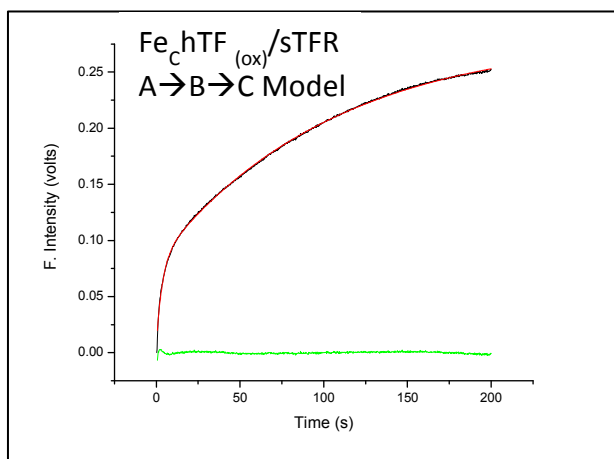



## REFERENCES

1. Byrne, S. L., Chasteen, N. D., Steere, A. N. & Mason, A. B. (2010). The unique kinetics of iron-release from transferrin: The role of receptor, lobe-lobe interactions and salt at endosomal pH. *J. Mol. Biol.* 396, 130-140.
